# Supplementary material
Source: PubMed Central journal article supplement (PMC7159293)
Supplement: mmc1.pdf [file mmc1.pdf]

## H5N1 infection of the respiratory tract and beyond: a molecular pathology study

Correspondence to:  
Prof Jiang Gu, Infectious Disease  
Centre, Peking University,  
Beijing, 100083 China  
[jianggu@bjmu.edu.cn](mailto:jianggu@bjmu.edu.cn)

|      |            |            |            |            |             |            |
|------|------------|------------|------------|------------|-------------|------------|
| 1    | atggagaaaa | tagtgctttt | ccttgcaata | gtcagccatg | ttaaaagtga  | tcagatttgc |
| 61   | attggttacc | atgcaaacaa | ctcgacagag | caggttgaca | caataatgga  | aaagaacgtt |
| 121  | actgttacac | atgcccaaga | catactggaa | aagacacaca | acgggaagct  | ctgcgatcta |
| 181  | ggtggagatg | agcctctgat | ttaagagat  | tgtagttag  | ctggatggct  | cctcggaaac |
| 241  | ccaatgtgtg | acgaatttat | caatgtgccg | gaatggctt  | acatagtgga  | gaaggccaac |
| 301  | ccagccaatg | acctctgta  | cccagggat  | ttcaacgact | atgaagaact  | gaaacaccta |
| 361  | ttgagcagaa | taaaccattt | tgagaaaatt | cagatcatcc | ccaaaagtcc  | ttggtccgat |
| 421  | catgaagcct | catcaggggt | gagctcagta | tgtccatacc | aggggaacgcc | ctccttttcc |
| 481  | agaaatgttg | tatggcttat | caaaaagaac | aatacatacc | caacaataaa  | gaaaagctac |
| 541  | aataatacca | accaggaaga | tcttttgata | ctgtggggga | ttcatcttc   | taatgatgcg |
| 601  | gcagagcaga | caaagctcta | tcaaaacca  | accactata  | tttccgttg   | gacatcaaca |
| 661  | ctaaccaga  | gattggtacc | aaaaatagct | actagatcca | aagtaaaccg  | gcaaagtgga |
| 721  | aggatggatt | tcttctggac | aatttataaa | ccgaatgatg | caatcaactt  | cgagagtaat |
| 781  | gggaatttca | ttgctccaga | atatgcatac | aaaattgtca | agaaagggga  | ctcagcaatt |
| 841  | atgaaaagtg | aagtggaata | tggtactgc  | aacaccaagt | gtcaaacctc  | aataggggag |
| 901  | ataaactcta | gtatgccatt | ccacaacata | cacctctca  | ccatcgggga  | atgcccaaaa |
| 961  | tatgtgaat  | caaacaatt  | agtcttgccg | actgggctca | gaaatagctc  | tctaagagaa |
| 1021 | agaagaagaa | aaagaggact | atgttgagct | atagcaggtt | ttatagagg   | aggatggcag |
| 1081 | ggaatgtag  | atggttgta  | tggtaccac  | catagcaatg | agcaggggag  | tgatgatgct |
| 1141 | gcagacaaag | aatccactca | aaaggcaata | gatggagtca | ccaataaggt  | caactcgatc |
| 1201 | attgacaaaa | tgaacctca  | gtttgaggcc | gttgaaggg  | aatttaacaa  | cttagaaaag |
| 1261 | agaatagaga | atttaacaa  | gaaaatgaa  | gacggattcc | tagatgtctg  | gacttataat |
| 1321 | gctgaacttc | tggttctcat | ggaaaatgag | agaactctag | acttccatga  | ctcaaatgtc |
| 1381 | aagaaccttt | acgacaaggt | ccgactacag | cttagggata | atgcaaagga  | gctgggtaac |
| 1441 | ggtgttttcg | agttctatca | caaatgtgat | aatgaatgta | tggaagtgt   | aagaacgga  |
| 1501 | acgtatgact | acccgagta  | ttcagaagaa | gcaagattaa | aaagagagga  | aataagtgga |
| 1561 | gtaaaattgg | aatcaatagg | aactacca   | atactgtcaa | tttattcaac  | agtggcgagt |
| 1621 | tctctagcac | tggcaatcat | ggtggctggt | ctatctttat | ggatgtgctc  | caatgggtcg |
| 1681 | ttacaatgca | gaatttgc   | ttaa       |            |             |            |
