# Supplementary material
Source: PubMed Central journal article supplement (PMC7159293)
Supplement: mmc6.pdf [file mmc6.pdf]

H5N1 infection of the respiratory tract and beyond: a molecular pathology study

Correspondence to:  
 Prof Jiang Gu, Infectious Disease  
 Centre, Peking University,  
 Beijing, 100083 China  
 jianggu@bjmu.edu.cn

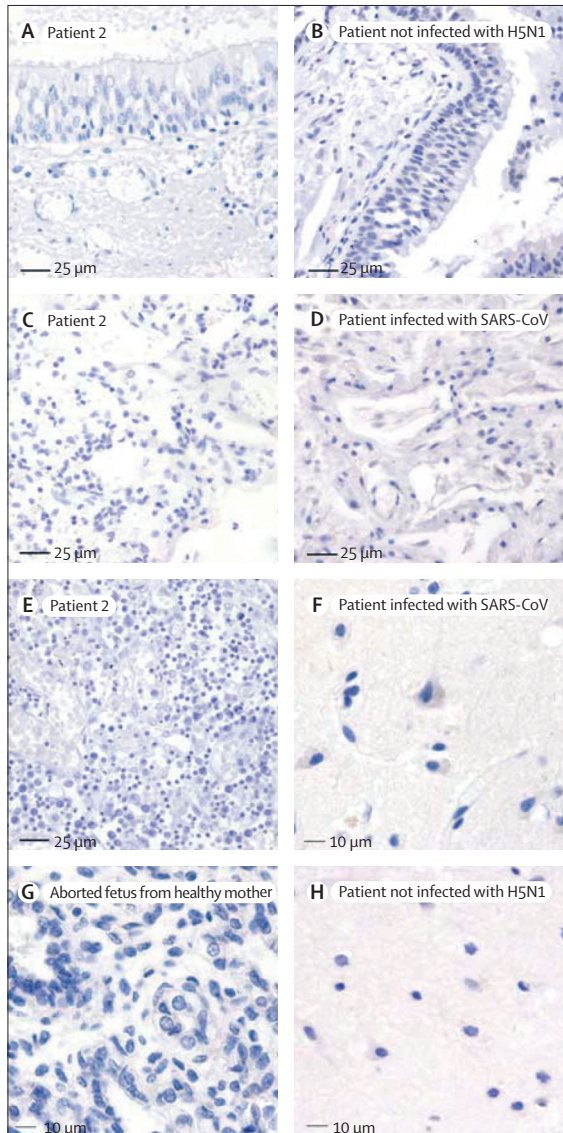

**Webfigure 5: Negative controls for immunohistochemistry**

No positive cells seen in any negative controls. (A) Tracheal tissue on which primary monoclonal antibody to nucleoprotein replaced with PBS. (B) Immunostaining with monoclonal antibody to nucleoprotein on tracheal tissue from patient not infected with H5N1. (C) Lung tissue on which primary monoclonal antibody to nucleoprotein replaced with PBS. (D) Immunostaining with monoclonal antibody to haemagglutinin on lung tissue from patient infected with SARS-CoV. (E) Immunostaining on lymph-node tissue on which primary antibody replaced with PBS. (F) Immunostaining with monoclonal antibody to haemagglutinin on brain tissue from patient infected with SARS-CoV. (G) Immunostaining with monoclonal antibody to haemagglutinin on lung tissue from aborted fetus from a healthy mother. (H) Immunostaining with monoclonal antibody to nucleoprotein on brain cortex tissue from patient not infected with H5N1.
