# Supplementary material
Source: PubMed Central journal article supplement (PMC7159293)
Supplement: mmc7.pdf [file mmc7.pdf]

## H5N1 infection of the respiratory tract and beyond: a molecular pathology study

Correspondence to:  
Prof Jiang Gu, Infectious Disease  
Centre, Peking University,  
Beijing, 100083 China  
[jianggu@bjmu.edu.cn](mailto:jianggu@bjmu.edu.cn)

|                               | Supplier                                      | Specificity                       | Dilution | Incubation temperature | Incubation period |
|-------------------------------|-----------------------------------------------|-----------------------------------|----------|------------------------|-------------------|
| CD3                           | Zymed Laboratories, San Francisco, CA, USA    | T cell                            | 1:100    | 4°C                    | Overnight         |
| CD20                          | Zymed Laboratories                            | B cell                            | 1:100    | 4°C                    | Overnight         |
| CD68                          | Zymed Laboratories                            | Macrophage, monocyte              | 1:100    | 4°C                    | Overnight         |
| CD8                           | DakoCytomation, Glostrup, Denmark             | Cytotoxic T cell                  | 1:50     | 4°C                    | Overnight         |
| Cytokeratin (AE1/AE3)         | Zymed Laboratories                            | Epithelial cell                   | 1:100    | 4°C                    | Overnight         |
| Surfactant protein A          | DakoCytomation                                | Type II pneumocyte                | 1:100    | 4°C                    | Overnight         |
| Tubulin-β                     | Zymed Laboratories                            | Ciliated cell                     | 1:100    | 4°C                    | Overnight         |
| Factor VIII                   | Zymed Laboratories                            | Endothelial cell                  | 1:100    | 4°C                    | Overnight         |
| PLAP                          | Zymed Laboratories                            | Placental syncytiotrophoblast     | 1:100    | 4°C                    | Overnight         |
| E-cadherin                    | Zymed Laboratories                            | Placental cytotrophoblast         | 1:100    | 4°C                    | Overnight         |
| Haemagglutinin                | Beijing perfect Biotechnology, Beijing, China | Human H5N1 (haemagglutinin)       | 1:200    | 4°C                    | Overnight         |
| Nucleoprotein                 | VivoStat-Inc, Portland, ME, USA               | Influenza A virus (nucleoprotein) | 1:20     | 4°C                    | Overnight         |
| Neurofilament                 | Zymed Laboratories                            | Neuron                            | 1:100    | 4°C                    | Overnight         |
| Neuron-specific enolase       | Zymed Laboratories                            | Neuron                            | 1:100    | 4°C                    | Overnight         |
| Gilal fibrillary acid protein | DakoCytomation                                | Glial cell                        | 1:100    | 4°C                    | Overnight         |

**Webtable:** Sources, dilutions, and incubation times of primary monoclonal antibodies used in immunohistochemistry
